# Supplementary material
Source: PubMed Central journal article supplement (PMC3095666)

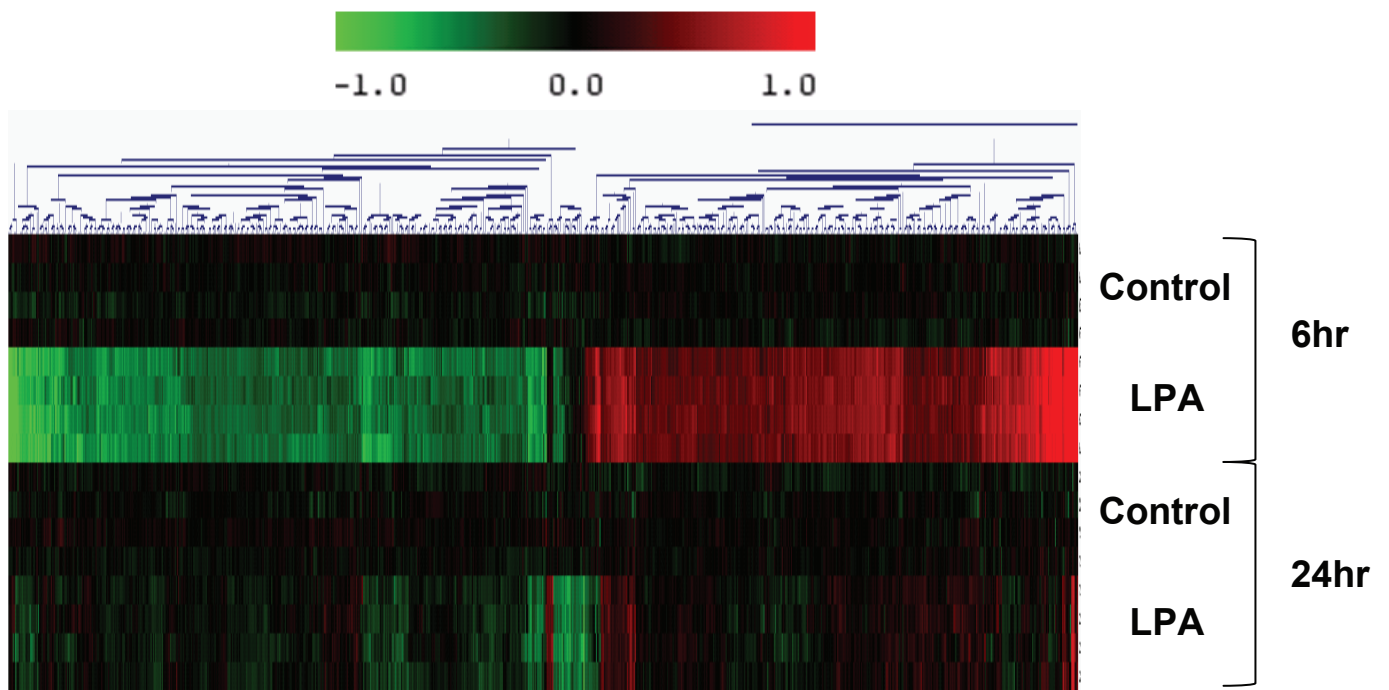

Supplement: NIHMS277838-supplement-04.pdf [file NIHMS277838-supplement-04.pdf]

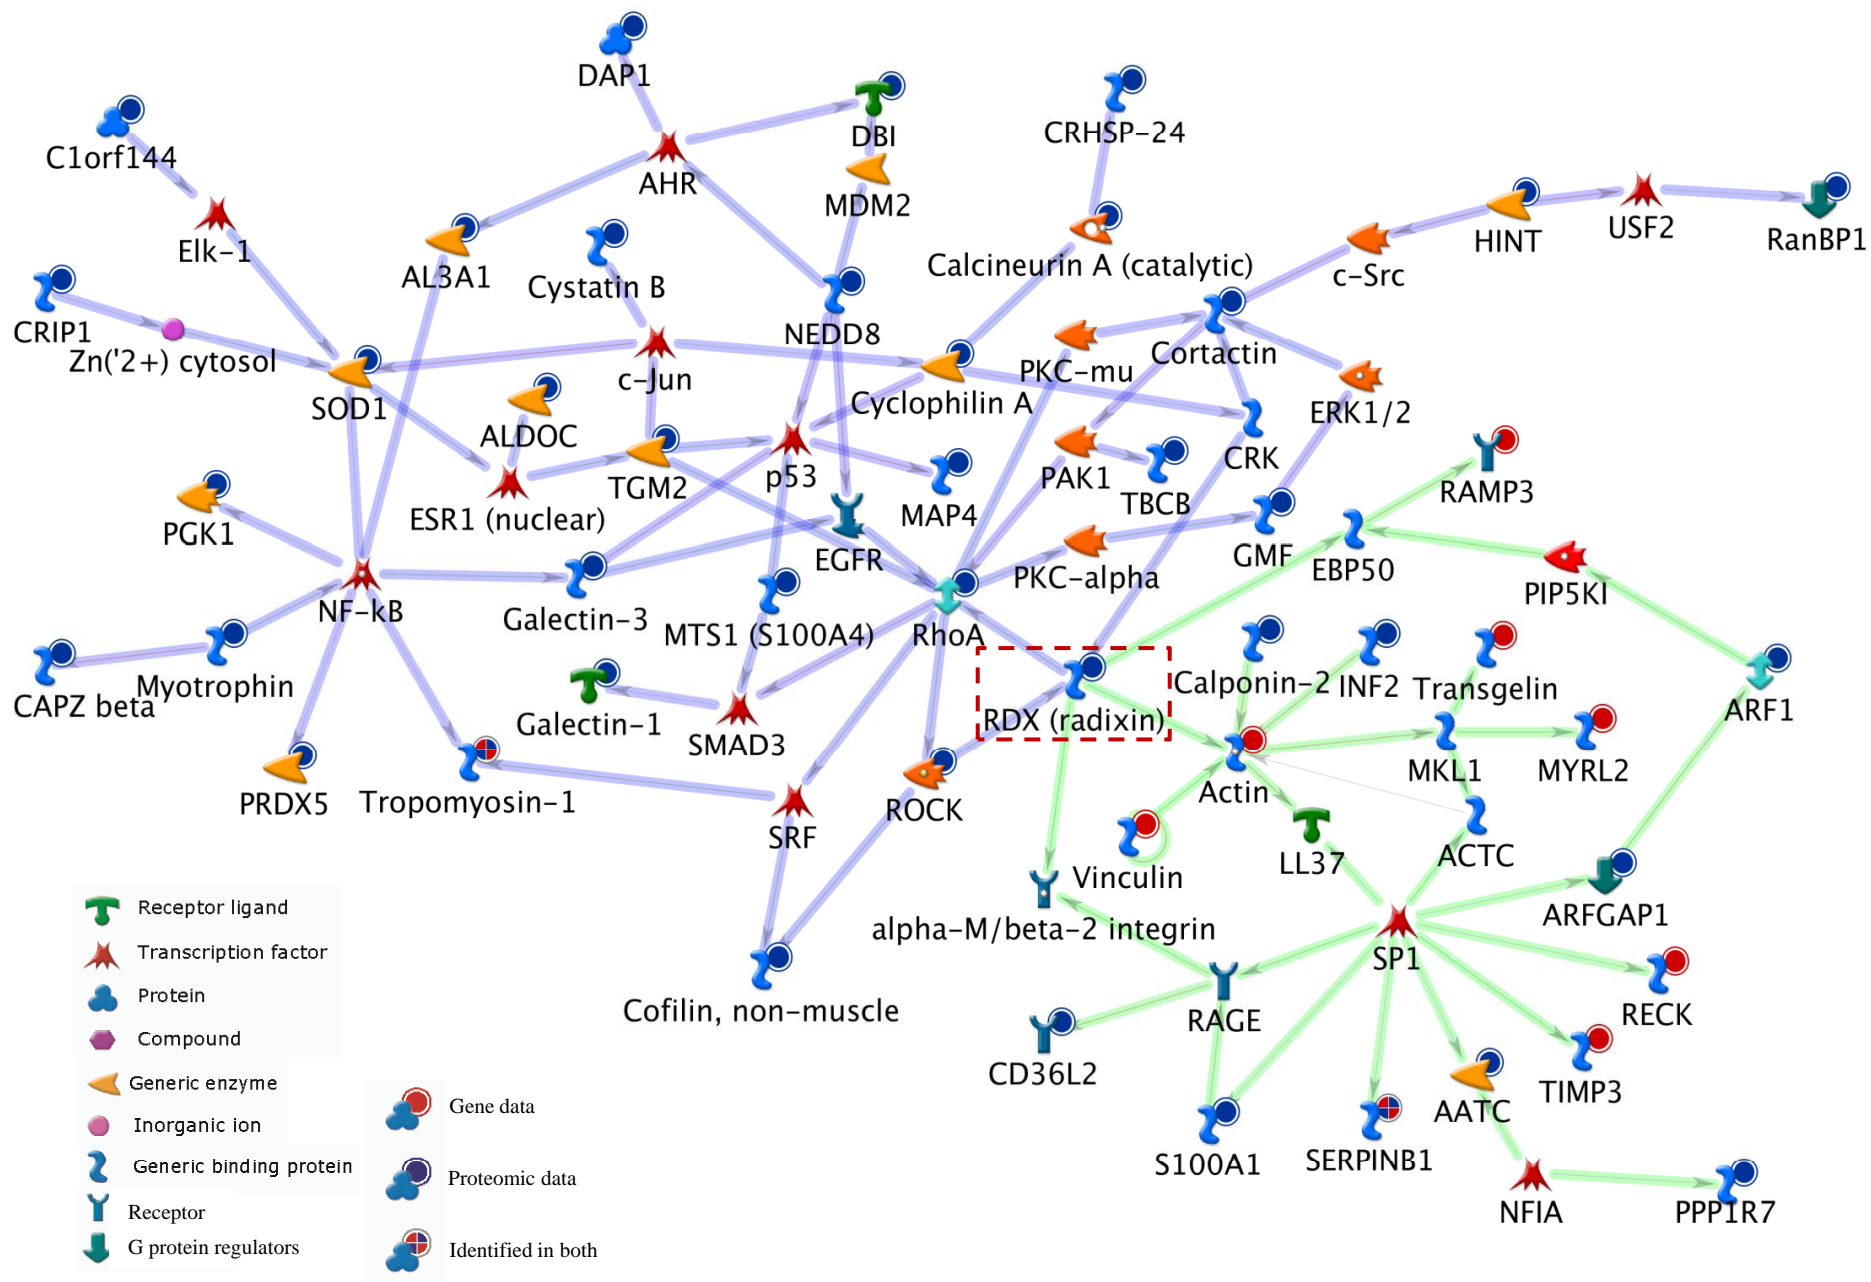

Supplement: NIHMS277838-supplement-05.pdf [file NIHMS277838-supplement-05.pdf]
